# Supplementary material
Source: Springer Nature journal article supplement (https://www.springermedizin.de/resource/supplementary/12943_2014_1285_MOESM3_ESM.pdf/9553146)
Supplement: MOESM3 [file 9553146]

Additional file 3

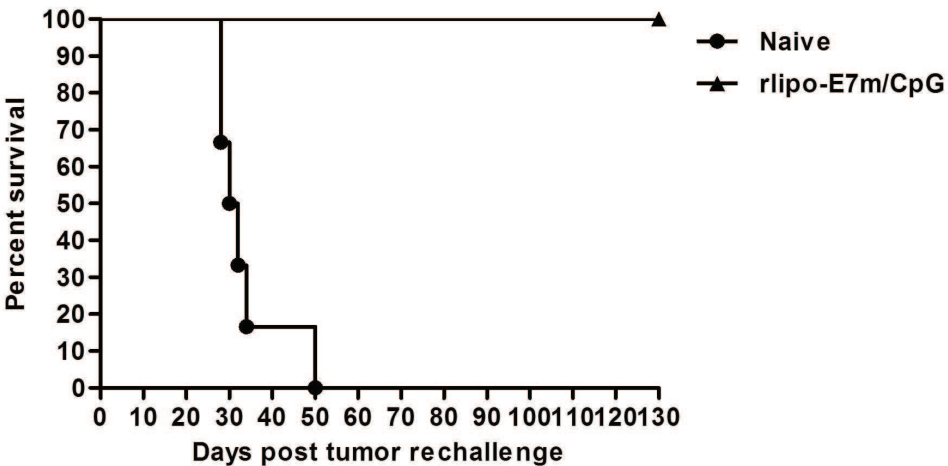

**Figure 3S: rliipo-E7m induced long-lasting memory of anti-tumor effects.** After treatment with rliipo-E7m/CpG, the tumor-free mice ( $n=9$ ) were re-challenged with TC-1 cells ( $2 \times 10^5$ /mouse) subcutaneously at 135 days (naive mice were used as a control). Kaplan-Meier analysis was performed on the mice survival data ( $*** P < 0.001$ , naive versus rliipo-E7m/CpG ). Tumor survival was determined based on 20% weight loss, unexpected moribundity or an inability to obtain food or water (as described in Materials and Methods).
